# Supplementary material
Source: MDPI journal article supplement (https://www.mdpi.com/2076-0760/12/5/301)
Supplement: s1 [file s1]

Archive with 3 entries (3 files):
- File S1. deglobapp.pdf
- File S2. b2chap13b.pdf
- File S3. deglobbib.pdf
