# Supplementary material
Source: MDPI journal article supplement (https://www.mdpi.com/2076-0760/12/5/301)
Supplement: s1 [file s1]

# References and Bibliography for “Waves of Structural Deglobalization: A World-Systems Perspective”

## Christopher Chase-Dunn, Alexis Alvarez and Yuhao Liao

- Aiyar, Shekhar and Anna Ilyina 2023 “Charting Globalization’s Turn to Slowbalization After Global Financial Crisis: Trade openness increased after the Second World War, but has slowed following the global financial crisis” IMF Blog, February 8  
<https://www.imf.org/en/Blogs/Articles/2023/02/08/charting-globalizations-turn-to-slowbalization-after-global-financial-crisis>
- Amin, Samir. 1990. *Delinking: Towards a Polycentric World*. London: Zed Books.
- Arase, David 2020 “China’s Rise, Deglobalization and the Future of Indo-Pacific Governance” Asia Global Papers, No. 2, July  
[https://www.asiaglobalinstitute.hku.hk/storage/app/media/AsiaGlobal%20Papers/chinas-rise-deglobalization-future-of-indo-pacific-governancedavid-arase.pdf?utm\\_source=Asia+Global+Institute&utm\\_campaign=a8829a189e-EMAIL\\_CAMPAIGN\\_2020\\_07\\_30\\_05\\_43&utm\\_medium=email&utm\\_term=0\\_c139173191-a8829a189e](https://www.asiaglobalinstitute.hku.hk/storage/app/media/AsiaGlobal%20Papers/chinas-rise-deglobalization-future-of-indo-pacific-governancedavid-arase.pdf?utm_source=Asia+Global+Institute&utm_campaign=a8829a189e-EMAIL_CAMPAIGN_2020_07_30_05_43&utm_medium=email&utm_term=0_c139173191-a8829a189e)
- Arrighi, Giovanni. 1994 *The Long Twentieth Century*. London: Verso.
- . 2006. *Adam Smith in Beijing*. London: Verso
- and Beverly Silver. 1999. *Chaos and Governance in the Modern World-System: Comparing Hegemonic Transitions*. Minneapolis: University of Minnesota Press.
- Bairoch, Paul 1996 “Globalization Myths and Realities: One Century of External Trade and Foreign Investment”, in Robert Boyer and Daniel Drache (eds.) , *States Against Markets: The Limits of Globalization*, London and New York: Routledge.
- Bairoch, Paul and Richard Kozul-Wright 1998 “Globalization myths: some historical reflections on integration, industrialization and growth in the world economy,” pp.37-68 in Richard Kozul-Wright and Robert Rowthorn (eds.) *Transnational Corporations and the Global Economy*. London: MacMillan
- Bair, Jennifer, ed. 2009 *Frontiers of Commodity Chains Research*. Palo Alto, CA: Stanford University Press.
- , Mathew Mahutga, Marion Werner and Liam Campling 2021 “Capitalist crisis in the ‘age of global value chains’” *EPA: Economy and Space*, 1–20. DOI: 10.1177/0308518X211006718
- Bello, Walden. 2002. *Deglobalization*. London: Zed Books.
- Bond, Patrick 2018 “East-West/North-South – or imperial-subimperial?: The BRICS, global governance and capital accumulation” *Human Geography* 11,2
- Brady, David, Jason Beckfield and Wei Zhao. 2007. “The Consequences of Economic Globalization for Affluent Democracies.” *Annual Review of Sociology* 33:313-334.
- Bromley, Patricia, Evan Schofer, Wesley Longhofer 2020 “Contentions over World Culture: The Rise of Legal Restrictions on Foreign Funding to NGOs, 1994–2015” *Social Forces*, Volume 99, Issue 1:281–304, <https://doi.org/10.1093/sf/soz138>
- Carroll, William K. 2016. *Expose, Oppose, Propose: Alternative Policy Groups and the Struggle for Global Justice*. New York: Zed.
- Chandy, Lawrence, and Brina Seidel 2016 “Is Globalization’s Second Wave about to Break?” *Global Views* 4 (October) Washington, Dc: Brookings Institution  
[https://www.brookings.edu/wp-content/uploads/2016/10/global\\_20161005\\_globalization-second-wave\\_.pdf](https://www.brookings.edu/wp-content/uploads/2016/10/global_20161005_globalization-second-wave_.pdf)

- Chase-Dunn, C. 1978. "Core-periphery relations: the effects of core competition," in Barbara H. Kaplan (ed.) *Social Change in the Capitalist World Economy*. Beverly Hills: Sage.
- Chase-Dunn, C. 1998 *Global Formation: Structures of The World-Economy*. Lanham, MD: Rowman and Littlefield.
- Chase-Dunn, C. 1999 "Globalization: a world-systems perspective," *Journal of World- Systems Research* 5,2, 186-216. <https://doi.org/10.5195/jwsr.1999.134>
- Chase-Dunn, C and Kelly M. Mann 1996 *The Wintu and Their Neighbors: A Very Small World-System in Northern California*. Tucson: University of Arizona Press
- Chase-Dunn, C., Yukio Kawano and Benjamin Brewer 2000 "Trade globalization since 1795: waves of integration in the world-system" *American Sociological Review* 65, 1: 77-95. <https://wsarch.ucr.edu/archive/papers/c-d&hall/isa99b/isa99b.htm>
- Chase-Dunn, C. and Andrew Jorgenson 2007 "Trajectories of trade and investment globalization" Pp. 165-185 in Ino Rossi (ed.) *Frontiers of Globalization Research: Theoretical and Methodological Approaches*. New York: Springer  
<https://irows.ucr.edu/papers/irows10/irows10.htm>
- Chase-Dunn, C., Roy Kwon, Kirk Lawrence and Hiroko Inoue 2011 "Last of the hegemons: U.S. decline and global governance" *International Review of Modern Sociology* 37,1: 1-29 (Spring). <https://irows.ucr.edu/papers/irows65/irows65.htm>
- Chase-Dunn, C. and Bruce Lerro 2014 *Social Change: Globalization from the Stone Age to the Present*. London: Routledge
- Chase-Dunn, C. Peter Grimes and E.N Anderson 2019, "Cyclical Evolution of the Global Right" *Canadian Review of Sociology/Revue canadienne de sociologie*, 56: 529-555.  
doi:10.1111/cars.12263
- Chase-Dunn, C and Paul Almeida 2020 *Global Struggles and Social Change*. Baltimore, MD: Johns Hopkins University Press.
- Chase-Dunn, C. and Hiroko Inoue (eds.) 2023 *Systemic Boundaries: Time-Mapping the Globalization of World-Systems*. Cham, Switzerland: Springer Nature
- Clelland, Don A. 2014 "The Core of the Apple: Degrees of Monopoly and Dark Value in Global Commodity Chains". *Journal of World-Systems Research*, 20(1), 82-111.  
<https://doi.org/10.5195/jwsr.2014.564>
- Abdal, Alexandre and Douglas M. Ferreira 2021 "Deglobalization, Globalization, and the Pandemic: Current Impasses of the Capitalist World-Economy" *Journal of World-Systems Research* 27 (1): 202-30. <https://doi.org/10.5195/jwsr.2021.1028>
- Galtung, Johan 1971 "A structural theory of imperialism" *Journal of Peace Research* 8,2: 81-117  
<https://www.jstor.org/stable/422946?read-now=1>
- Gamso, Jonas & Nelson, Roy & Grosse, Robert. 2022. "De-Globalization is a Myth". *AIB Insights*. 22. DOI:10.46697/001c.32513
- Goodman, Peter S, 2023 "Why Chinese Companies Are Investing Billions in Mexico" New York Times, February 3. <https://www.nytimes.com/2023/02/03/business/china-mexico-trade.html>
- Grinen, Leonid and Andrey Korotayev 2014 "Origins of Globalization in the Framework of the AfroEurasian World System History" *Journal of Globalization Studies*, Vol. 5 No. 1, May Pp 32-64
- Gygli, Savina, Florian Haelg, Niklas Potrafke and Jan-Egbert Sturm (2019): The KOF Globalisation Index – Revisited, *Review of International Organizations*, 14(3), 543-574 [https://doi.org/10.1007/s11558-019-09344-2call\\_made](https://doi.org/10.1007/s11558-019-09344-2call_made).
- Harvey, David 2005 *A Brief History of Neoliberalism*. New York; Oxford University Press
- Hirst, Paul Q., Graham Thompson, and Simon Bromley 2018 *Globalization in Question*. Jaipur:

Rawat

Hodos, Tamar (ed.) 2017 *Routledge Handbook of Archaeology and Globalization* New York:  
Routledge <https://doi.org/10.4324/9781315449005>

Hopkins, Terence K., and Immanuel Wallerstein 1986 “Commodity Chains in the World-  
Economy Prior to 1800” *Review (Fernand Braudel Center)* Vol. 10, No. 1, pp. 157-170  
<https://www.jstor.org/stable/40241052>

- Jimenez, Peter F. 2020. *The Mesoamerican World System, 200–1200 CE: A Comparative Approach Analysis of West Mexico*. Cambridge, UK: Cambridge University Press  
<https://data.imf.org/regular.aspx?key=61013712>
- Karatasli, Sahan Savas 2022 “Surplus Populations, Working-Class Struggles and Crises of Capitalism: A World-Historical Materialist Reconceptualization” Pp 207-250 in A. Piva, A. Santella (eds.) *Marxism, Social Movements and Collective Action*, Cham Switzerland: Palgrave/MacMillan (Springer Nature) [https://doi.org/10.1007/978-3-031-12474-7\\_10](https://doi.org/10.1007/978-3-031-12474-7_10)
- Kentor, Jeffrey and Robert Clark 2023 “Is the World Economy “Deglobalizing”? The Shifting Economic Geography of Foreign Investment (FDI) Networks and Its Impact on Economic Growth, 2009-2017” in Christian Suter and Patrick Ziltener (eds), *After Globalization: The Future of World Society*. Vol. 8 of the World Society Studies at LIT
- Kim, Jisoo 2020 “Deglobalization and Global Value Chains in the Core of the World-System” IROWS Working Paper # 140 at <https://irows.ucr.edu/papers/irows140/irows140.htm>
- KOF Globalization Index <http://www.kof.ethz.ch/globalisation/>
- Korzeniewicz, R. P., Moran, T. P., & Consiglio, D. 1998 “Global Divergence Since 1820: Challenging the Consensus” *Department of Sociology, University of Maryland, College Park, Maryland. Unpublished manuscript*.
- 2012 *Unveiling Inequality: A World Historical Perspective*. New York: Russell Sage.
- Kravis, Irving B., Alan Heston and Robert Summers 1982 *World Product and Income: International Comparisons of Real Gross Product*. Baltimore: Johns Hopkins University Press.
- Leontief, Wassily 1974 “Structure of the world economy: outline of a simple input-output formulation” *The American Economic Review*, 823-834
- Levy, Jack S. 1983 *War in the Modern Great Power System, 1495-1975*. Lexington: University Press of Kentucky.
- Macrotrends 2022 <https://www.macrotrends.net/countries/USA/united-states/tariff-rates?>U.S.Tariff Rates 1989-2022>. Retrieved 2022-08-12.
- Maddison, Angus 1995 *Monitoring the World Economy, 1820-1992*. Paris: OECD
- Mahutga, Matthew C. 2012. “When Do Value Chains Go Global? A Theory of the Spatialization of Value Chain Linkages.” *Global Networks* 12(1):1–21.
- Mahutga, Matthew C., Anthony Roberts and Ronald Kwon 2017 “The Globalization of Production and Income Inequality in Rich Democracies” *Social Forces* 96(1) 181–214, September 2017
- Mann, Michael 2012 *The Sources of Social Power*, Volume 4. Cambridge: Cambridge University Press.
- Mc Michael, Phillip 2017 *Development and Social Change*. Thousand Oaks, CA; Sage.
- Meyer, John W. 2009. *World Society: The Writings of John W. Meyer*. New York: Oxford University Press.
- Mitchell, Brian R. 1992. *International Historical Statistics: Europe 1750-1988*. 3<sup>rd</sup> edition. New York: Stockton.
- Mitchell, Brian R. 1993. *International Historical Statistics: The Americas 1750-1988*. 2<sup>nd</sup> edition. New York: Stockton.
- Mitchell, Brian R. 1995. *International Historical Statistics: Africa, Asia, and Oceania 1750-1988*. 2<sup>nd</sup> edition. New York: Stockton.
- Mittelman, James H. Forthcoming “Reimagining Globalization: Plausible Futures,” in Manfred B. Steger, Roland Benedikter, and Harald Pechlaner, (eds.) *Globalization: Past, Present,*

- Future.*
- Modelski, George 2005 “Long-Term Trends in Global Politics.” *Journal of World-Systems Research*. 11(2): 195-206.
- Modelski, George and William R. Thompson 1988 *Seapower in Global Politics, 1494-1943*. Seattle: University of Washington Press.
- 1994 *Leading Sectors and World Powers: the Coevolution of Global Economics and Politics*. Columbia: University of South Carolina Press.
- O’Rourke, Kevin H. 2018 “Two Great Trade Collapses: The Interwar Period and Great Recession Compared” *IMF Economic Review*. **66** (3): 418–439. doi:10.1057/s41308-017-0046-0.
- O’Rourke, Kevin H., and Jeffrey G. Williamson 2002 “When Did Globalisation Begin?” *European Review of Economic History* 6 (1): 23–50.
- OECD (Organization for Economic Cooperation and Development) 2005 *Measuring Globalisation: OECD Economic Globalisation Indicators 2005*  
<https://www.oecd.org/sti/ind/measuringglobalisationoecdeconomicglobalisationindicators2005.htm>
- OECD 2010 *Measuring Globalisation: OECD Economic Globalisation Indicators*, Paris: OECD  
<https://www.oecd.org/sti/ind/measuringglobalisationoecdeconomicglobalisationindicators2010.htm>
- Pleyers, Geoffrey 2011 *Alter-Globalization*. Malden, MA: Polity Press
- Robinson, Kim Stanley 2020 *The Ministry of the Future* New York: Hachette Book Group
- Robinson, William I. 2019 *Into the Tempest: Essays on the New Global Capitalism*. Chicago: Haymarket
- 2023 “The Violent Crackup of the Post-WWII International Order: Notes on the Geopolitical Crisis and Global Capital”. *Journal of World-Systems Research*, 29(1), 227–232. <https://doi.org/10.5195/jwsr.2023.1153>
- Rodrik, Dani 2018 “Populism and the Economics of Globalization.” *Journal of International Business Policy* DOI: <https://doi.org/10.1057/s42214-018-001-4>
- Shannon, Thomas R. 1996 *An Introduction to the World-System Perspective*. London: Routledge.
- Scholte, Jan A. 2008 “Defining globalization” *The World Economy*, 13(11) 1471–1502.
- Smith, David A. and Douglas White 1992 “Structure and dynamics of the global economy: network analysis of international trade, 1965-1980.” *Social Forces* 70,4:857-893.
- Taylor; Peter J. 1996 *The Way the Modern World Works: World Hegemony to World Impasse* New York: Wiley.
- Tilly, Charles 1995 “Globalization Threatens Labor’s Rights.” *International Labor and Working-Class History* 47(Spring):1– 23.
- Tyralla, Michael 2019 “Accumulation by Taxploitation: A World-Systems Analysis of Offshore Tax Dodging and its Evolving Impact on the Capitalist World-Economy. Unpublished PhD dissertation. City University of Hong Kong
- Van Bergeijk, Peter A.G. 2010 *On the Brink of Deglobalization: An Alternative Perspective on the Causes of the World Trade Collapse*. Cheltenham Glos GL50 2JA UK: Edward Elgar
- 2018a ‘On the brink of deglobalization...again’, *Cambridge Journal of Regions, Economy and Society* rsx023. DOI: <https://doi.org/10.1093/cjres/rsx023>
- 2018b “Deglobalisation 2.0: Trump and Brexit are but symptoms” (March 13) Deglobalisation Series <https://issblog.nl/2018/03/13/deglobalisation-series-deglobalisation-2-0-trump-and-brexite-are-but-symptoms-by-peter-a-g-van-bergeijk/>
- Wallerstein, Immanuel 1984 “The three instances of hegemony in the history of the capitalist world-economy.” Pp. 100-108 in Gerhard Lenski (ed.) *Current Issues and Research in Macrosociology*, International Studies in Sociology and Social Anthropology, Vol. 37. Leiden: E.J. Brill.
- 2003 *The Decline of American Power*. New York: New Press.

- 2012 *The Modern World- System*, vol. 4. Berkeley, CA: University of California Press.
- Williamson, Jeffrey G. “Globalization, Convergence, and History.” *The Journal of Economic History*, vol. 56, no. 2, 1996, pp. 277–306. JSTOR, <http://www.jstor.org/stable/2123967>
- Witt, Michael A. 2019 “De-globalization: theories, predictions and opportunities for international business research” *Journal of International Business Studies* Volume 50, Issue 7, pp 1053–1077 | <https://link.springer.com/article/10.1057/s41267-019-00219-7>
- Witt, Michael A., Arie Y. Lewin, Peter Ping Li and Ajai Gaurd 2023 “Decoupling in international business: evidence, drivers, impact and implications for IB research” *Journal of World Business* Volume 58, Issue 1. <https://doi.org/10.1016/j.jwb.2022.101399>
- World Bank 2020 *World Development Report: Trading for Development in the Age of Global Value Chains*. <https://www.worldbank.org/en/publication/wdr2020>
- World Bank 2023. *World Development Indicators* [online]. Washington DC. <https://databank.worldbank.org/source/world-development-indicators#>
- World Trade Organization 2019 *Global Value Chain Development Report 2019: Technological Innovation, Supply Chain Trade and Workers in a Globalized World*. Geneva: WTO
