# Supplementary material
Source: MDPI journal article supplement (https://www.mdpi.com/2076-0760/12/5/301)
Supplement: s1 [file s1 › File S1. deglobapp.pdf]

# “Waves of Structural Deglobalization: A World-Systems Perspective”

Christopher Chase-Dunn, Alexis Alvarez and Yuhao Liao

<https://irows.ucr.edu/cd/appendices/deglob/deglobapp.pdf>

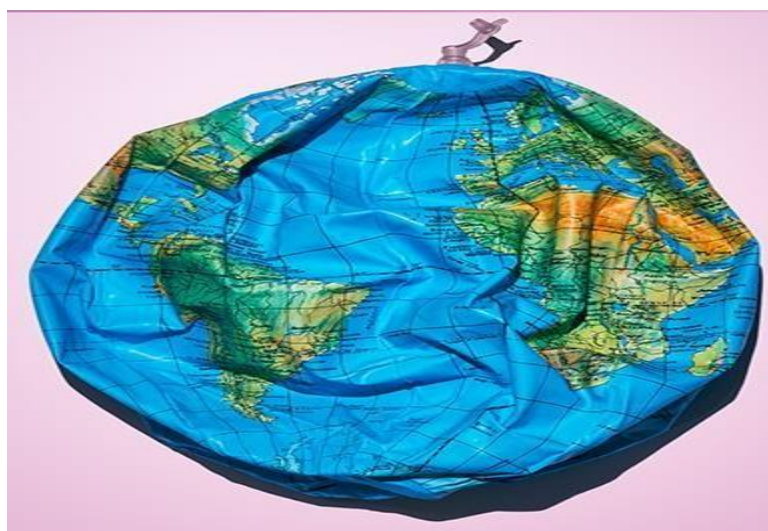

add refs to main paper

Citation of article: Chase-Dunn, Christopher, Alexis Álvarez, and Yuhao Liao. 2023. Waves of Structural Deglobalization: A World-Systems Perspective. *Social Sciences* 12: 301. <https://doi.org/10.3390/socsci12050301>

## Supplementary Table of Contents

| Figures, graphs and images:                                                                                                           | Page |
|---------------------------------------------------------------------------------------------------------------------------------------|------|
| Figure S1: Number of Countries with Data on Openness, 1795-1995                                                                       | 3    |
| Figure S2: Average Openness Trade Globalization estimated from all countries for which we have openness data (5 year moving average). | 4    |
| Figure S3: Average Openness Trade Globalization: Constant cases, 1795- 1995                                                           | 5    |
| Figure S4: Investment Globalization: Weighted Total Investment Income Debits, 1938-1999.                                              | 6    |
| Figure S5: 19 <sup>th</sup> century Colonization and Decolonization                                                                   | 7    |
| Figure S6: Flyer from the Anti-Corn Law League                                                                                        | 8    |

Deglobalization Bibliography with hot links and including publications not cited in  
main article: <https://irows.ucr.edu/cd/appendices/deglob/deglobbib.pdf>

Link to *Global Formation*, Chapter 13 “World-System Fluctuations”:

<https://irows.ucr.edu/cd/appendices/deglob/b2chap13b.pdf>

“An early effort to theorize periodic shifts from multilateral to bilateral multicentric links between the core and the noncore argued that increasing competition among core states during periods of economic contraction led to a more segmented structure in which each core state concentrated its efforts to obtain raw materials from particular non-core regions, leading to a less multicentric structure of global trade (Chase-Dunn 1978, 1998; Chapter 13).”

Links to our excel data sets:

Trade Globalization/ Deglobalization (deglob4):

<https://irows.ucr.edu/cd/appendices/deglob/deglob4.xlsx>

Foreign Direct Investment Inflows and Outflows (FDIFlows):

<https://irows.ucr.edu/cd/appendices/deglob/FDIFlows.xlsx>

Links to Data Sources:

Maddison Project, Historical Statistics

<https://www.rug.nl/ggdc/historicaldevelopment/maddison/?lang=en>

KOF Globalization Index <http://www.kof.ethz.ch/globalisation/>

World Bank World Development Indicators

<https://databank.worldbank.org/source/world-development-indicators#>

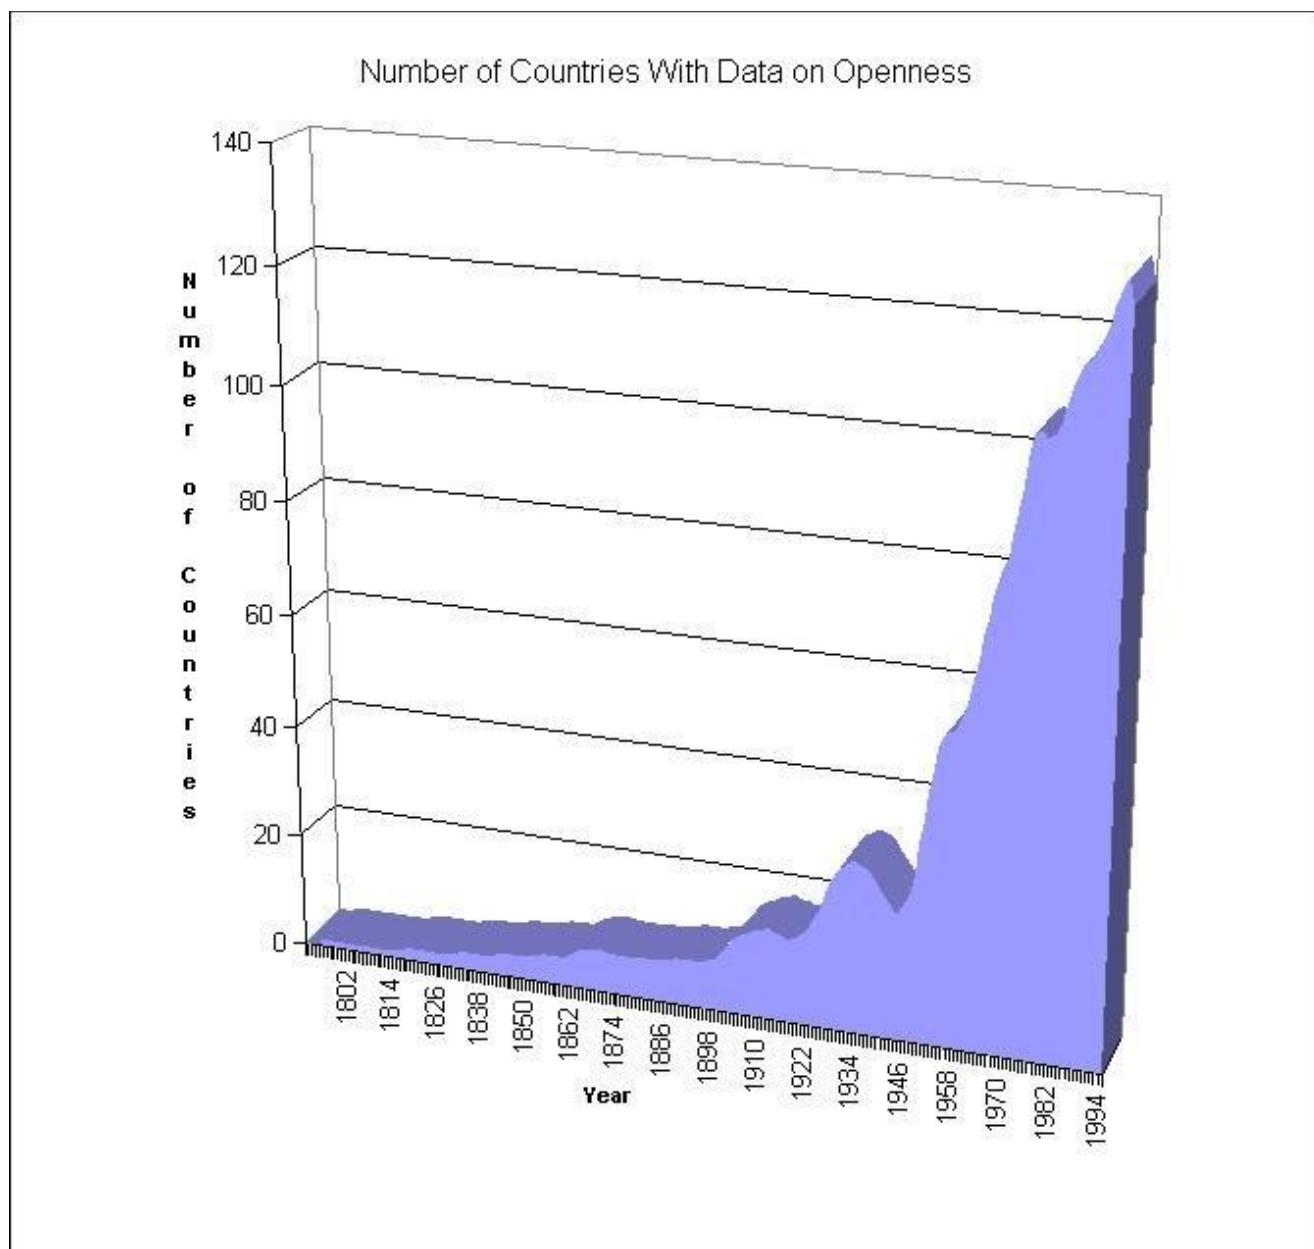

Figure S1: Number of Countries with Data on Openness, 1795-1995

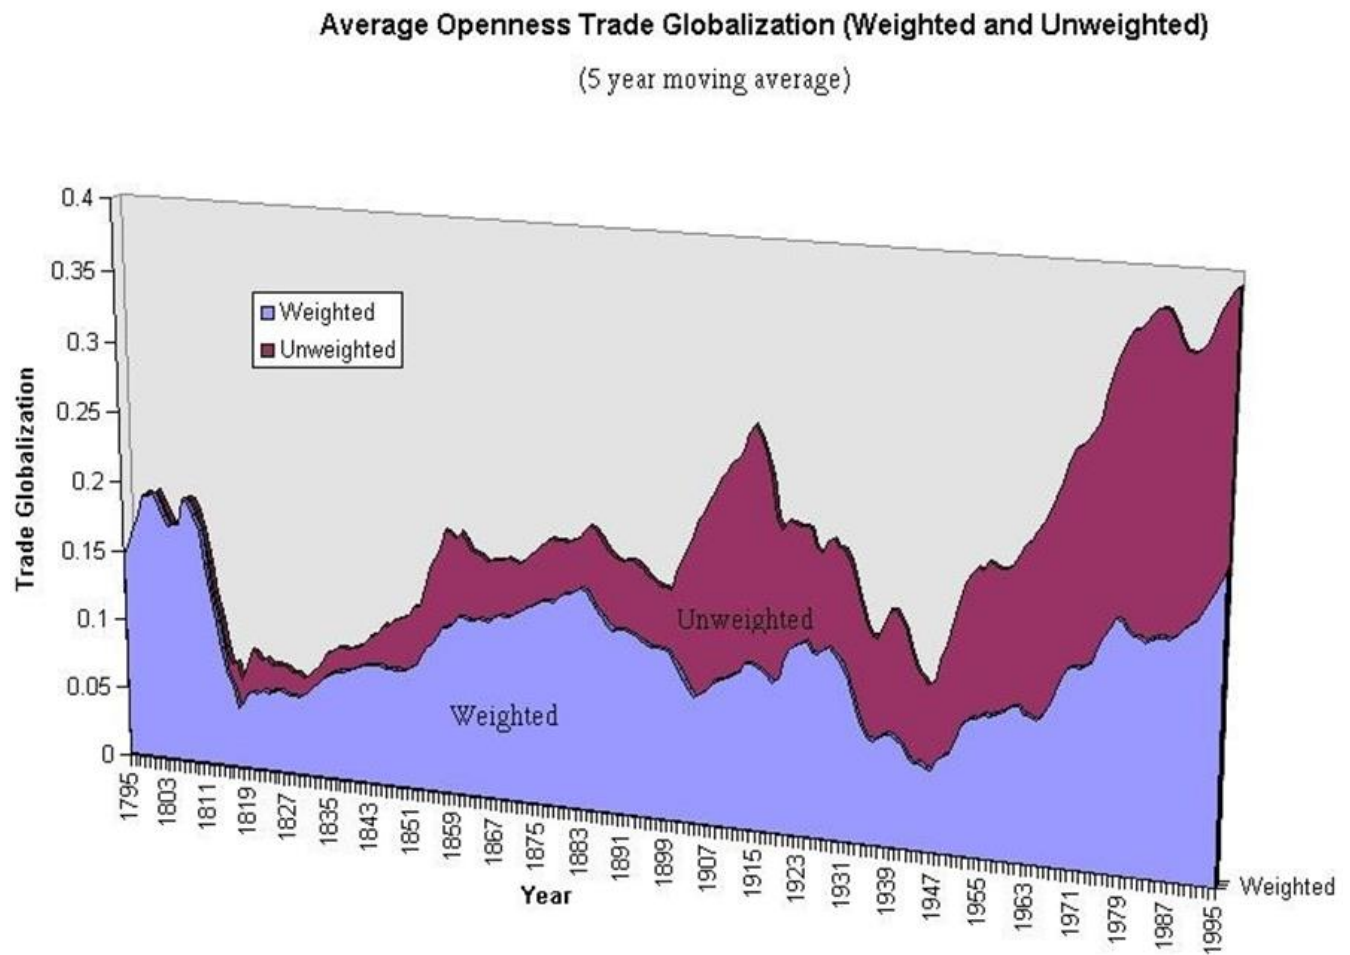

Figure S2: Average Openness Trade Globalization estimated from all countries for which we have openness data (5 year moving average). Pearson's  $r$  correlation coefficient for weighted and unweighted is .73.

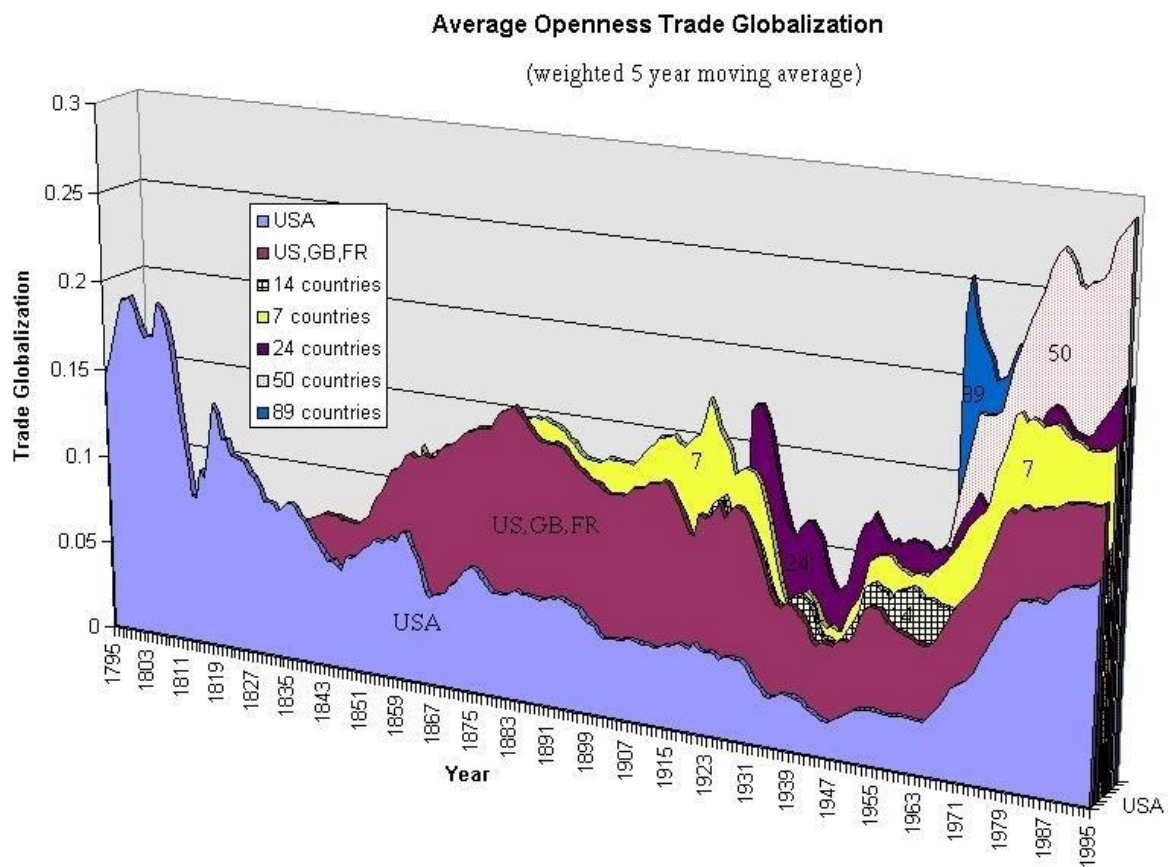

Figure S3: Average Openness Trade Globalization: Constant cases, 1795- 1995

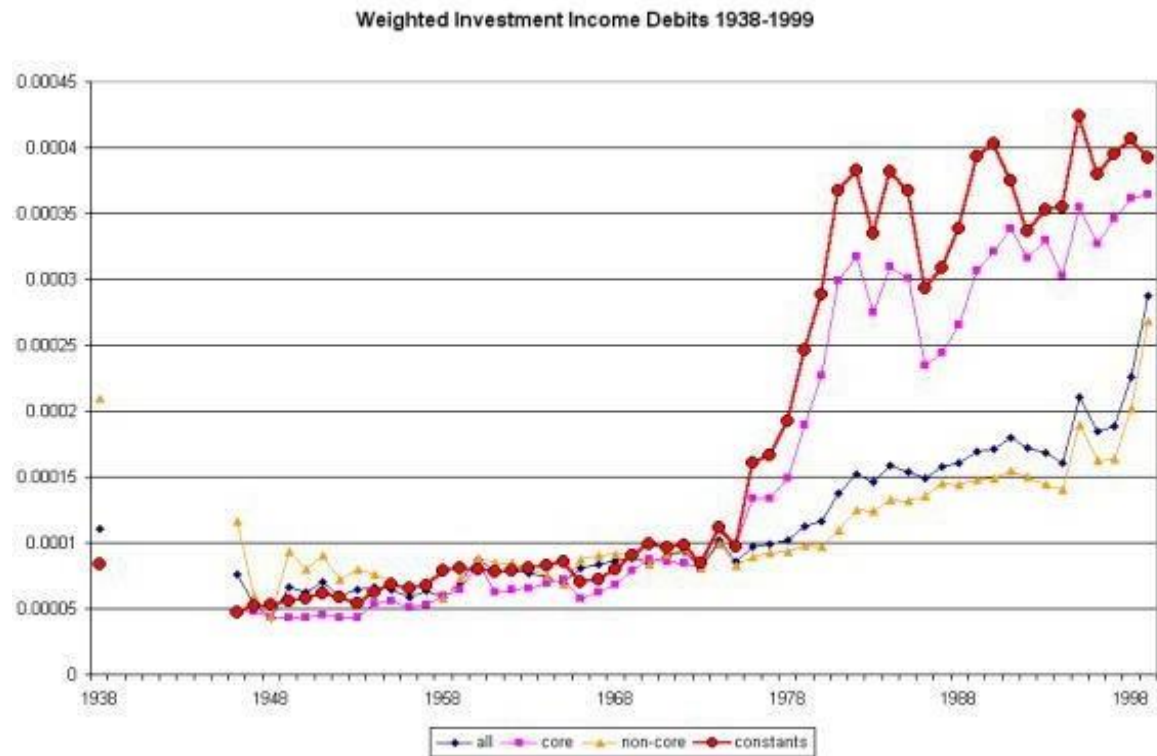

Figure S4: Investment Globalization: Weighted Total Investment Income Debits, 1938-1999.  
Source: Chase-Dunn and Jorgenson 2007.

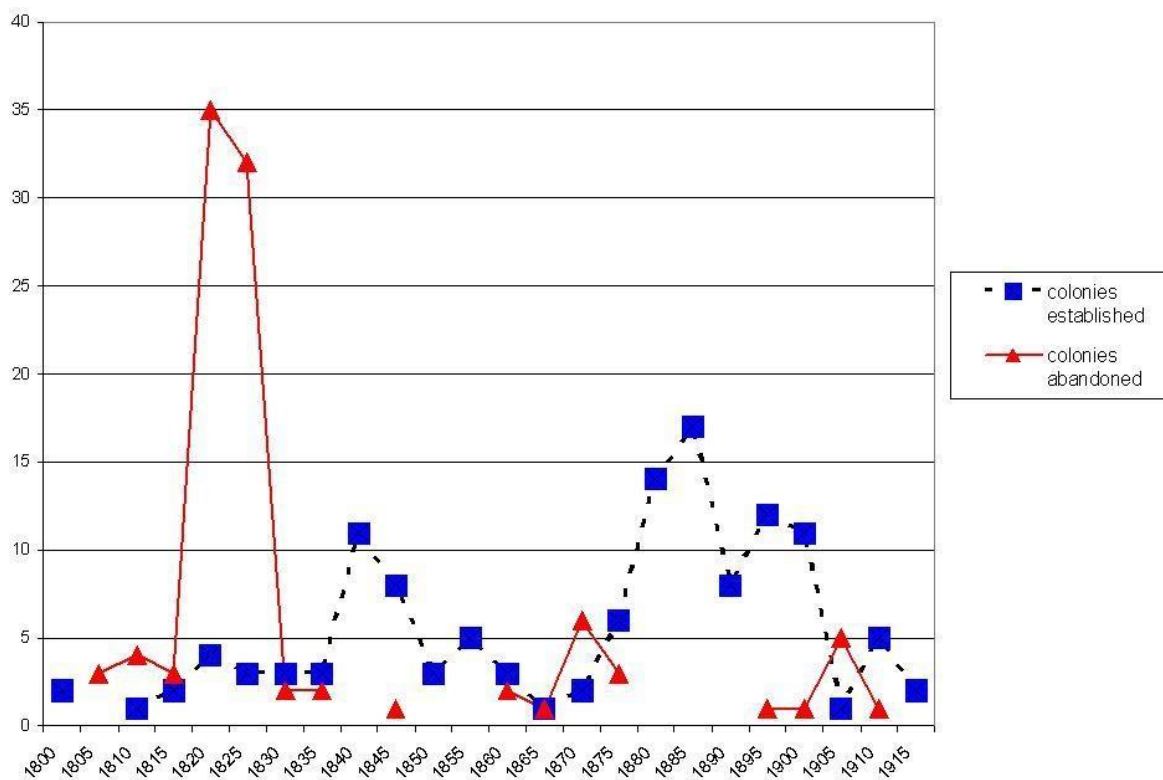

Figure S5: 19<sup>th</sup> century Colonization and Decolonization. Source: Henige, David P. 1970 *Colonial Governors From the Fifteenth Century to the Present*. Madison, WI: University of Wisconsin Press.

“... another wave of European colonialism was contemporaneous with the period of deglobalization that emerged in the late 19th century (see Figure 5 in Appendix).

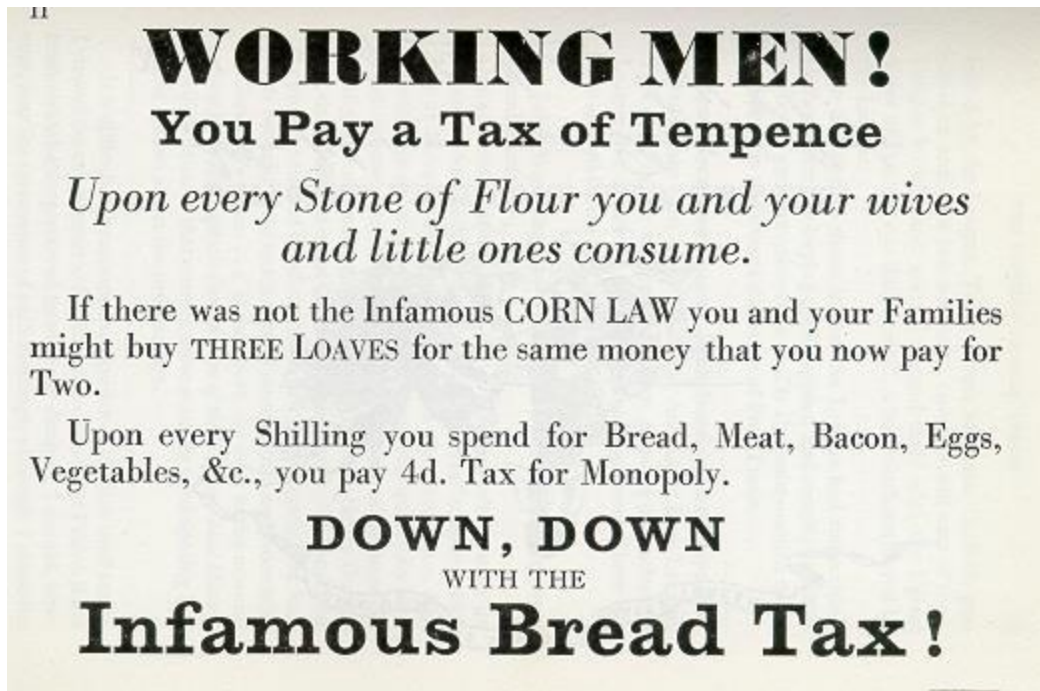

Figure S6: A flyer circulated by the English Anti-Corn Law League in 1842.

“The Corn Law was a tariff on the import of foreign cereals that protected domestic farmers from competition from abroad. Cobden and Bright pointed out that this was a tax on the working class that augmented the incomes of landlords. See the league’s poster appealing for consumer support for free trade in Appendix, Figure 6”
